# Supplementary material for: Current Intervention Treatments for Food Addiction: A Systematic Review
Source: MDPI journal article supplement (doi:10.3390/bs11060080), 2021-05-23
Supplement: s1 [file s1]

## **YFAS Systematic Review Search Protocol**

### **Key words**

#### Set 1

- Yale food addiction scale
- YFAS
- questionnaire
- scale
- instrument
- measure
- tool

#### Set 2

- treatment
- therapy
- intervention
- program

#### Set 3

- feeding and eating disorders
- compulsive eat
- overeat
- hyperphagia
- eating addiction
- food addiction
- hedonic eat
- addictive eat
- craving
- binge eat

#### Set 4

- food preferences
- food habits
- food
- eat behaviour
- eat
- feeding behaviour
- addictive behaviour
- behaviour addiction
- substance-related disorders
- substance-use disorders

#### Set 5

- teen
- adolescent
- adult
- paediatrics
- patient
- participant
- Combine set 1 and set 2 and set 3 and set 4 and set 5

### **Databases**

- The Cochrane Library,

- CINAHL (Cumulative Index to Nursing and Allied Health)
- MEDLINE
- EMBASE (Excerpta Medica Database)
- Scopus
- Informit Health Collection
- Proquest
- Web of Science
- PsycINFO

**Limits:** humans, English language, 2008 onwards

### Medline, Embase, PsychInfo, CINAHL

|                                                                    |
|--------------------------------------------------------------------|
| (yale food addiction scale or YFAS).mp.                            |
| (scale* or instrument* or measure* or questionnaire* or tool*).mp. |
| 1 or 2                                                             |
| treatment*.mp.                                                     |
| therap*.mp.                                                        |
| (intervention* or program*).mp.                                    |
| 4 or 5 or 6                                                        |
| "feeding and eating disorders"/                                    |
| "compulsive eat*".mp.                                              |
| overeat*.mp.                                                       |
| Hyperphagia/                                                       |
| eating addict*.mp.                                                 |
| food addiction/ or food addict*.mp.                                |
| "hedonic eat*".mp.                                                 |
| "addictive eat*".mp.                                               |
| Craving/                                                           |
| "binge eat*".mp.                                                   |
| 8 or 9 or 10 or 11 or 12 or 13 or 14 or 15 or 16 or 17             |
| Food Preferences/                                                  |
| "food habits".mp.                                                  |
| Food/                                                              |
| (eat* behaviour or eat* behavior or eat*).mp.                      |
| Feeding behavior/ or feed* behaviour.mp.                           |
| Behavior, Addictive/ or behave* addiction.mp.                      |
| Substance-Related Disorders/                                       |
| substance-use disorder.mp.                                         |
| 19 or 20 or 21 or 22 or 23 or 24 or 25 or 26                       |
| teen*.mp. or adolescent/ or adolesc*.mp.                           |
| adult/ or adult*.mp.                                               |
| Pediatrics/ or paediatrics.mp.                                     |
| Patients/ or patient*.mp. or participant*.mp.                      |
| 28 or 29 or 30 or 31                                               |
| Combine 3 and 7 and 18 and 27 and 32                               |

### Cochrane, Scopus, Web of Science, Proquest

("Yale food addiction scale" OR YFAS OR questionnaire\* OR scale\* OR instrument\* OR measure\* OR tool\*)  
AND (treatment\* OR therap\* OR intervention\* OR program\*) AND ((feeding and "eating disorders") OR  
"compulsive eat\*" OR overeat\* OR hyperphagia OR "eating addict\*" OR ("food addiction" OR "food  
addict\*") OR "hedonic eat\*" OR "addictive eat\*" OR craving OR "binge eat\*") AND ("food preferences" OR  
"food habits" OR food OR ("eat\* behaviour" OR "eat\* behavior" OR eat\*) OR ("feed\* behaviour" OR "feed\*  
behavior") OR ("addictive behaviour" OR "behave\* addiction") OR "substance-related disorders" OR  
"substance-use disorders") AND (teen\* OR adolescent\*) OR (adult OR adult\*) OR (paediatrics OR pediatrics)

OR (patient\* OR participant\*)
